# Supplementary material for: Cu4MnGe2S7 and Cu2MnGeS4: two polar thiogermanates exhibiting second harmonic generation in the infrared and structures derived from hexagonal diamond
Source: Royal Society of Chemistry journal article supplement (doi:10.1039/d1dt02535j), 2021-01-01
Supplement: d1dt02535j1.pdf [file d1dt02535j1.pdf]

## **Cu<sub>2</sub>MnGeS<sub>4</sub> and Cu<sub>4</sub>MnGe<sub>2</sub>S<sub>7</sub>: Two Polar Thiogermanates Exhibiting Second Harmonic Generation in the Infrared and Structures Derived from Hexagonal Diamond.**

Jennifer R. Glenn,<sup>a</sup> Jeong Bin Cho,<sup>b</sup> Yiqun Wang,<sup>c</sup> Andrew J. Craig,<sup>a</sup> Jian-Han Zhang,<sup>d</sup> Marvene Cribbs,<sup>a</sup> Stanislav S. Stoyko,<sup>a</sup> Christopher Barton,<sup>a</sup> Allyson Bonnoni,<sup>a</sup> Kate E. Rosello,<sup>a</sup> Pedro Grima-Gallardo,<sup>e,f</sup> Joseph H. MacNeil,<sup>g</sup> James M. Rondinelli,<sup>c</sup> Joon I. Jang,<sup>†b</sup> and Jennifer A. Aitken<sup>†a</sup>

### **Supporting Information**

| <b>Item</b>                                                                                                                                                                                                                                                                                                                | <b>Page</b> |
|----------------------------------------------------------------------------------------------------------------------------------------------------------------------------------------------------------------------------------------------------------------------------------------------------------------------------|-------------|
| <b>Table S1. Crystal data, data collection and structure refinement details for Cu<sub>4</sub>MnGe<sub>2</sub>S<sub>7</sub>.</b>                                                                                                                                                                                           | S2          |
| <b>Table S2. Fractional atomic coordinates and isotropic or equivalent isotropic displacement parameters (Å<sup>2</sup>) for Cu<sub>4</sub>MnGe<sub>2</sub>S<sub>7</sub>.</b>                                                                                                                                              | S3          |
| <b>Table S3. Atomic displacement parameters (Å<sup>2</sup>) for Cu<sub>4</sub>MnGe<sub>2</sub>S<sub>7</sub>.</b>                                                                                                                                                                                                           | S3          |
| <b>Table S4. Bond distances (Å) for Cu<sub>4</sub>MnGe<sub>2</sub>S<sub>7</sub>.</b>                                                                                                                                                                                                                                       | S4          |
| <b>Table S5. Bond angles (°) for Cu<sub>4</sub>MnGe<sub>2</sub>S<sub>7</sub>.</b>                                                                                                                                                                                                                                          | S5          |
| <b>Table S6. Average bond distances (Å) and angles (°) for Cu<sub>4</sub>MnGe<sub>2</sub>S<sub>7</sub>.</b>                                                                                                                                                                                                                | S6          |
| <b>Table S7. Extended connectivity table for Cu<sub>4</sub>MnGe<sub>2</sub>S<sub>7</sub> used to predict structural distortions according to Pauling's second rule.</b>                                                                                                                                                    | S7          |
| <b>Table S8. Bond valence sums, provided for each crystallographically unique ion, and global instability index (G) values for Cu<sub>2</sub>MnGeS<sub>4</sub> and Cu<sub>4</sub>MnGe<sub>2</sub>S<sub>7</sub>.</b>                                                                                                        | S8          |
| <b>Table S9. The electronic bandgaps at different <i>k</i>-points using the PBE and HSE06 functional in Cu<sub>2</sub>MnGeS<sub>4</sub>.</b>                                                                                                                                                                               | S9          |
| <b>Table S10: The electronic bandgaps at different <i>k</i>-points using the PBE and HSE06 functional in Cu<sub>4</sub>MnGe<sub>2</sub>S<sub>7</sub>.</b>                                                                                                                                                                  | S9          |
| <b>Figure S1. Simulated precession images for Cu<sub>4</sub>MnGe<sub>2</sub>S<sub>7</sub> created using the single-crystal X-ray diffraction data. The (0kl), (h0l), and (hk0) planes in reciprocal space are shown from left to right, respectively. Sharp, bright spots are observed indicative of a single crystal.</b> | S10         |
| <b>Figure S2. Differential thermal analysis diagrams for Cu<sub>2</sub>MnGeS<sub>4</sub> (top) and Cu<sub>4</sub>MnGe<sub>2</sub>S<sub>7</sub> (bottom). Two cycles were conducted for each experiment.</b>                                                                                                                | S11         |
| <b>Figure S3. Attenuated total reflectance FT-IR data converted to transmittance for Cu<sub>2</sub>MnGeS<sub>4</sub> and Cu<sub>4</sub>MnGe<sub>2</sub>S<sub>7</sub>.</b>                                                                                                                                                  | S11         |

Table S1. Crystal data, data collection and structure refinement details for Cu<sub>4</sub>MnGe<sub>2</sub>S<sub>7</sub>.

|                                                                                                                            |                                                                 |
|----------------------------------------------------------------------------------------------------------------------------|-----------------------------------------------------------------|
| Formula weight                                                                                                             | 678.70                                                          |
| Crystal system, space group                                                                                                | Monoclinic, Cc (No.9)                                           |
| Temperature (K)                                                                                                            | 296                                                             |
| <i>a</i> (Å)                                                                                                               | 16.7332(3)                                                      |
| <i>b</i> (Å)                                                                                                               | 6.47600(10)                                                     |
| <i>c</i> (Å)                                                                                                               | 9.8022(2)                                                       |
| $\beta$ (°)                                                                                                                | 93.1517(9)                                                      |
| <i>V</i> (Å <sup>3</sup> )                                                                                                 | 1060.60(3)                                                      |
| <i>Z</i>                                                                                                                   | 4                                                               |
| <i>F</i> (000)                                                                                                             | 1268                                                            |
| Density g cm <sup>-3</sup>                                                                                                 | 4.250                                                           |
| Radiation type                                                                                                             | Mo Ka                                                           |
| $\mu$ (mm <sup>-1</sup> )                                                                                                  | 15.93                                                           |
| Crystal size (mm)                                                                                                          | 0.18 x 0.14 x 0.10                                              |
| Crystal habit and color                                                                                                    | Irregular polyhedron, black                                     |
| Diffractometer                                                                                                             | Bruker SMART Apex II                                            |
| Radiation source                                                                                                           | Fine-focus sealed tube                                          |
| Absorption correction                                                                                                      | Multi-scan, SADABS (Sheldrick, 2002)                            |
| No. of measured reflections                                                                                                | 4396                                                            |
| No. of independent reflections                                                                                             | 2405                                                            |
| No. of observed reflections [ <i>I</i> >2 $\sigma$ ( <i>I</i> )]                                                           | 2282                                                            |
| $\theta_{\min}$ , $\theta_{\max}$ (°)                                                                                      | 2.4, 27.5                                                       |
| Completeness to $\theta=27.5^\circ$                                                                                        | 100%                                                            |
| Limiting indices                                                                                                           | -21 ≤ <i>h</i> ≤ 21<br>-8 ≤ <i>k</i> ≤ 8<br>-12 ≤ <i>l</i> ≤ 12 |
| <i>R</i> <sub>int</sub>                                                                                                    | 0.015                                                           |
| <i>R</i> [ <i>F</i> <sup>2</sup> > 2 $\sigma$ ( <i>F</i> <sup>2</sup> )], w <i>R</i> ( <i>F</i> <sup>2</sup> ), * <i>S</i> | 0.021, 0.055, 1.07                                              |
| ( $\Delta/\sigma$ ) <sub>max</sub>                                                                                         | 0.001                                                           |
| Extinction coefficient                                                                                                     | 0.00567 (18)                                                    |
| No. of data/restraints/parameters                                                                                          | 0.70                                                            |
| $\Delta\rho_{\max}$ , $\Delta\rho_{\min}$ (e Å <sup>-3</sup> )                                                             | -0.89                                                           |
| Absolute structure parameter (Flack parameter)                                                                             | 0.063 (12)                                                      |

Table S2. Fractional atomic coordinates and isotropic or equivalent isotropic displacement parameters ( $\text{\AA}^2$ ) for  $\text{Cu}_4\text{MnGe}_2\text{S}_7$ .

|     | <i>x</i>     | <i>y</i>     | <i>z</i>      | $U_{\text{iso}}^*/U_{\text{eq}}$ |
|-----|--------------|--------------|---------------|----------------------------------|
| Cu1 | −0.00193 (6) | 0.18000 (17) | −0.00131 (13) | 0.0196 (3)                       |
| Cu2 | 0.06549 (5)  | 0.3393 (2)   | 0.36035 (14)  | 0.0190 (2)                       |
| Cu3 | 0.21237 (5)  | 0.3196 (2)   | 0.07988 (12)  | 0.0197 (3)                       |
| Cu4 | 0.35325 (4)  | 0.67831 (12) | 0.28351 (9)   | 0.0186 (3)                       |
| Mn  | 0.28394 (8)  | 0.15156 (18) | 0.43729 (12)  | 0.0143 (2)                       |
| Ge1 | 0.42802 (3)  | 0.16344 (7)  | 0.15672 (6)   | 0.00867 (19)                     |
| Ge2 | 0.63880 (4)  | 0.32497 (18) | 0.22799 (10)  | 0.00879 (19)                     |
| S1  | 0.03322 (11) | 0.16743 (19) | 0.56571 (13)  | 0.0090 (3)                       |
| S2  | 0.17008 (10) | 0.15178 (17) | 0.27258 (13)  | 0.0118 (4)                       |
| S3  | 0.24068 (10) | 0.6649 (2)   | 0.13736 (14)  | 0.0120 (4)                       |
| S4  | 0.32846 (10) | 0.19229 (18) | −0.00212 (15) | 0.0108 (3)                       |
| S5  | 0.39302 (10) | 0.33995 (19) | 0.33827 (13)  | 0.0107 (3)                       |
| S6  | 0.46156 (9)  | 0.16029 (18) | 0.69731 (14)  | 0.0099 (4)                       |
| S7  | 0.60848 (10) | 0.1666 (2)   | 0.41601 (15)  | 0.0106 (3)                       |

Table S3. Atomic displacement parameters ( $\text{\AA}^2$ ) for  $\text{Cu}_4\text{MnGe}_2\text{S}_7$ .

|     | $U^{11}$    | $U^{22}$   | $U^{33}$   | $U^{12}$    | $U^{13}$    | $U^{23}$     |
|-----|-------------|------------|------------|-------------|-------------|--------------|
| Cu1 | 0.0179 (4)  | 0.0244 (4) | 0.0164 (5) | −0.0028 (4) | 0.0016 (3)  | −0.0014 (3)  |
| Cu2 | 0.0189 (5)  | 0.0167 (4) | 0.0211 (4) | −0.0003 (3) | −0.0021 (3) | −0.0012 (3)  |
| Cu3 | 0.0168 (5)  | 0.0216 (5) | 0.0205 (5) | 0.0016 (3)  | −0.0001 (4) | −0.0003 (3)  |
| Cu4 | 0.0183 (5)  | 0.0191 (4) | 0.0186 (6) | −0.0008 (4) | 0.0022 (4)  | −0.0004 (3)  |
| Mn  | 0.0127 (4)  | 0.0157 (4) | 0.0144 (5) | 0.0003 (5)  | 0.0006 (4)  | −0.0003 (4)  |
| Ge1 | 0.0075 (3)  | 0.0090 (3) | 0.0094 (3) | 0.0002 (3)  | 0.0000 (2)  | −0.0009 (2)  |
| Ge2 | 0.0086 (3)  | 0.0080 (2) | 0.0096 (4) | 0.0002 (2)  | −0.0006 (2) | 0.00001 (19) |
| S1  | 0.0076 (6)  | 0.0094 (5) | 0.0100 (6) | 0.0004 (5)  | 0.0008 (5)  | −0.0012 (4)  |
| S2  | 0.0140 (9)  | 0.0081 (6) | 0.0132 (7) | −0.0005 (5) | 0.0004 (6)  | −0.0006 (4)  |
| S3  | 0.0119 (10) | 0.0111 (6) | 0.0130 (6) | 0.0017 (4)  | 0.0010 (6)  | −0.0006 (4)  |
| S4  | 0.0078 (8)  | 0.0140 (5) | 0.0104 (5) | −0.0003 (5) | −0.0005 (5) | 0.0018 (5)   |
| S5  | 0.0115 (8)  | 0.0104 (6) | 0.0102 (6) | 0.0012 (4)  | 0.0020 (6)  | −0.0016 (4)  |
| S6  | 0.0104 (9)  | 0.0087 (5) | 0.0108 (6) | −0.0007 (4) | 0.0020 (6)  | −0.0002 (4)  |
| S7  | 0.0124 (9)  | 0.0101 (6) | 0.0095 (5) | 0.0002 (5)  | 0.0012 (6)  | 0.0011 (4)   |

Table S4. Bond distances (Å) for Cu<sub>4</sub>MnGe<sub>2</sub>S<sub>7</sub>.

|                       |             |                        |             |
|-----------------------|-------------|------------------------|-------------|
| Cu1—S7 <sup>i</sup>   | 2.2852 (18) | Cu4—S4 <sup>v</sup>    | 2.321 (2)   |
| Cu1—S5 <sup>i</sup>   | 2.2969 (17) | Cu4—S5                 | 2.3437 (16) |
| Cu1—S6 <sup>i</sup>   | 2.3161 (18) | Mn—S4 <sup>vi</sup>    | 2.4119 (17) |
| Cu1—S1 <sup>ii</sup>  | 2.4077 (14) | Mn—S2                  | 2.429 (2)   |
| Cu2—S7 <sup>iii</sup> | 2.2942 (15) | Mn—S3 <sup>v</sup>     | 2.4371 (18) |
| Cu2—S6 <sup>i</sup>   | 2.2963 (16) | Mn—S5                  | 2.441 (2)   |
| Cu2—S2                | 2.3332 (19) | Ge1—S6 <sup>ii</sup>   | 2.2008 (13) |
| Cu2—S1                | 2.3879 (17) | Ge1—S5                 | 2.2207 (14) |
| Cu3—S4                | 2.2959 (17) | Ge1—S4                 | 2.2247 (15) |
| Cu3—S7 <sup>i</sup>   | 2.3029 (16) | Ge1—S1 <sup>vii</sup>  | 2.2949 (16) |
| Cu3—S2                | 2.3230 (18) | Ge2—S7                 | 2.1930 (14) |
| Cu3—S3                | 2.348 (2)   | Ge2—S2 <sup>viii</sup> | 2.2179 (15) |
| Cu4—S6 <sup>iv</sup>  | 2.2933 (18) | Ge2—S3 <sup>ix</sup>   | 2.2218 (16) |
| Cu4—S3                | 2.3046 (16) | Ge2—S1 <sup>vii</sup>  | 2.3120 (15) |

Symmetry codes: (i)  $x-1/2, -y+1/2, z-1/2$ ; (ii)  $x, -y, z-1/2$ ; (iii)  $x-1/2, y+1/2, z$ ; (iv)  $x, -y+1, z-1/2$ ; (v)  $x, -y+1, z+1/2$ ; (vi)  $x, -y, z+1/2$ ; (vii)  $x+1/2, -y+1/2, z-1/2$ ; (viii)  $x+1/2, y+1/2, z$ ; (ix)  $x+1/2, y-1/2, z$ ; (x)  $x-1/2, -y+1/2, z+1/2$ ; (xi)  $x-1/2, y-1/2, z$ ; (xii)  $x+1/2, -y+1/2, z+1/2$ .

Table S5. Bond angles (°) for Cu<sub>4</sub>MnGe<sub>2</sub>S<sub>7</sub>.

|                                           |            |                                           |             |
|-------------------------------------------|------------|-------------------------------------------|-------------|
| S7 <sup>i</sup> —Cu1—S5 <sup>i</sup>      | 112.64 (8) | Ge1 <sup>x</sup> —S1—Ge2 <sup>x</sup>     | 107.21 (6)  |
| S7 <sup>i</sup> —Cu1—S6 <sup>i</sup>      | 111.09 (5) | Ge1 <sup>x</sup> —S1—Cu2                  | 108.61 (5)  |
| S5 <sup>i</sup> —Cu1—S6 <sup>i</sup>      | 111.91 (7) | Ge2 <sup>x</sup> —S1—Cu2                  | 111.74 (10) |
| S7 <sup>i</sup> —Cu1—S1 <sup>ii</sup>     | 108.24 (7) | Ge1 <sup>x</sup> —S1—Cu1 <sup>vi</sup>    | 111.78 (8)  |
| S5 <sup>i</sup> —Cu1—S1 <sup>ii</sup>     | 107.49 (5) | Ge2 <sup>x</sup> —S1—Cu1 <sup>vi</sup>    | 111.93 (6)  |
| S6 <sup>i</sup> —Cu1—S1 <sup>ii</sup>     | 105.05 (8) | Cu2—S1—Cu1 <sup>vi</sup>                  | 105.59 (7)  |
| S7 <sup>iii</sup> —Cu2—S6 <sup>i</sup>    | 112.34 (6) | Ge2 <sup>xi</sup> —S2—Cu3                 | 111.43 (7)  |
| S7 <sup>iii</sup> —Cu2—S2                 | 109.68 (7) | Ge2 <sup>xi</sup> —S2—Cu2                 | 113.31 (9)  |
| S6 <sup>i</sup> —Cu2—S2                   | 107.38 (8) | Cu3—S2—Cu2                                | 108.93 (6)  |
| S7 <sup>iii</sup> —Cu2—S1                 | 108.22 (9) | Ge2 <sup>xi</sup> —S2—Mn                  | 107.37 (6)  |
| S6 <sup>i</sup> —Cu2—S1                   | 112.92 (7) | Cu3—S2—Mn                                 | 106.14 (9)  |
| S2—Cu2—S1                                 | 106.09 (5) | Cu2—S2—Mn                                 | 109.40 (7)  |
| S4—Cu3—S7 <sup>i</sup>                    | 112.99 (9) | Ge2 <sup>iii</sup> —S3—Cu4                | 110.65 (7)  |
| S4—Cu3—S2                                 | 114.71 (6) | Ge2 <sup>iii</sup> —S3—Cu3                | 113.03 (9)  |
| S7 <sup>i</sup> —Cu3—S2                   | 109.47 (7) | Cu4—S3—Cu3                                | 109.41 (5)  |
| S4—Cu3—S3                                 | 105.22 (6) | Ge2 <sup>iii</sup> —S3—Mn <sup>iv</sup>   | 111.25 (7)  |
| S7 <sup>i</sup> —Cu3—S3                   | 105.37 (7) | Cu4—S3—Mn <sup>iv</sup>                   | 102.30 (8)  |
| S2—Cu3—S3                                 | 108.48 (9) | Cu3—S3—Mn <sup>iv</sup>                   | 109.66 (7)  |
| S6 <sup>iv</sup> —Cu4—S3                  | 115.07 (6) | Ge1—S4—Cu3                                | 113.62 (7)  |
| S6 <sup>iv</sup> —Cu4—S4 <sup>v</sup>     | 110.68 (6) | Ge1—S4—Cu4 <sup>iv</sup>                  | 119.99 (8)  |
| S3—Cu4—S4 <sup>v</sup>                    | 113.32 (7) | Cu3—S4—Cu4 <sup>iv</sup>                  | 112.59 (6)  |
| S6 <sup>iv</sup> —Cu4—S5                  | 106.88 (6) | Ge1—S4—Mn <sup>ii</sup>                   | 107.70 (5)  |
| S3—Cu4—S5                                 | 108.61 (6) | Cu3—S4—Mn <sup>ii</sup>                   | 99.32 (10)  |
| S4 <sup>v</sup> —Cu4—S5                   | 101.12 (6) | Cu4 <sup>iv</sup> —S4—Mn <sup>ii</sup>    | 100.29 (7)  |
| S4 <sup>vi</sup> —Mn—S2                   | 112.62 (7) | Ge1—S5—Cu1 <sup>xii</sup>                 | 107.10 (8)  |
| S4 <sup>vi</sup> —Mn—S3 <sup>v</sup>      | 110.71 (8) | Ge1—S5—Cu4                                | 112.44 (7)  |
| S2—Mn—S3 <sup>v</sup>                     | 106.13 (7) | Cu1 <sup>xii</sup> —S5—Cu4                | 113.98 (6)  |
| S4 <sup>vi</sup> —Mn—S5                   | 109.38 (7) | Ge1—S5—Mn                                 | 107.30 (5)  |
| S2—Mn—S5                                  | 108.17 (7) | Cu1 <sup>xii</sup> —S5—Mn                 | 105.10 (6)  |
| S3 <sup>v</sup> —Mn—S5                    | 109.75 (6) | Cu4—S5—Mn                                 | 110.45 (8)  |
| S6 <sup>ii</sup> —Ge1—S5                  | 114.92 (6) | Ge1 <sup>vi</sup> —S6—Cu4 <sup>v</sup>    | 107.58 (7)  |
| S6 <sup>ii</sup> —Ge1—S4                  | 112.35 (5) | Ge1 <sup>vi</sup> —S6—Cu2 <sup>xii</sup>  | 107.62 (6)  |
| S5—Ge1—S4                                 | 107.29 (6) | Cu4 <sup>v</sup> —S6—Cu2 <sup>xii</sup>   | 109.07 (6)  |
| S6 <sup>ii</sup> —Ge1—S1 <sup>vii</sup>   | 109.36 (6) | Ge1 <sup>vi</sup> —S6—Cu1 <sup>xii</sup>  | 110.48 (7)  |
| S5—Ge1—S1 <sup>vii</sup>                  | 107.92 (5) | Cu4 <sup>v</sup> —S6—Cu1 <sup>xii</sup>   | 110.89 (6)  |
| S4—Ge1—S1 <sup>vii</sup>                  | 104.40 (6) | Cu2 <sup>xii</sup> —S6—Cu1 <sup>xii</sup> | 111.09 (8)  |
| S7—Ge2—S2 <sup>viii</sup>                 | 110.10 (9) | Ge2—S7—Cu1 <sup>xii</sup>                 | 108.88 (6)  |
| S7—Ge2—S3 <sup>ix</sup>                   | 109.62 (6) | Ge2—S7—Cu2 <sup>ix</sup>                  | 108.44 (8)  |
| S2 <sup>viii</sup> —Ge2—S3 <sup>ix</sup>  | 110.25 (7) | Cu1 <sup>xii</sup> —S7—Cu2 <sup>ix</sup>  | 103.71 (10) |
| S7—Ge2—S1 <sup>vii</sup>                  | 112.63 (8) | Ge2—S7—Cu3 <sup>xii</sup>                 | 111.55 (12) |
| S2 <sup>viii</sup> —Ge2—S1 <sup>vii</sup> | 106.16 (6) | Cu1 <sup>xii</sup> —S7—Cu3 <sup>xii</sup> | 109.25 (7)  |
| S3 <sup>ix</sup> —Ge2—S1 <sup>vii</sup>   | 108.00 (8) | Cu2 <sup>ix</sup> —S7—Cu3 <sup>xii</sup>  | 114.62 (7)  |

Symmetry codes: (i)  $x-1/2, -y+1/2, z-1/2$ ; (ii)  $x, -y, z-1/2$ ; (iii)  $x-1/2, y+1/2, z$ ; (iv)  $x, -y+1, z-1/2$ ; (v)  $x, -y+1, z+1/2$ ; (vi)  $x, -y, z+1/2$ ; (vii)  $x+1/2, -y+1/2, z-1/2$ ; (viii)  $x+1/2, y+1/2, z$ ; (ix)  $x+1/2, y-1/2, z$ ; (x)  $x-1/2, -y+1/2, z+1/2$ ; (xi)  $x-1/2, y-1/2, z$ ; (xii)  $x+1/2, -y+1/2, z+1/2$ .

Table S6. Average bond distances (Å) and angles (°) for  $\text{Cu}_4\text{MnGe}_2\text{S}_7$ .

|               | Average bond distance (Å) |            | Average bond angle (°) |
|---------------|---------------------------|------------|------------------------|
| Cu1-S         | 2.326(3)                  | S-Cu1-S    | 109.4(2)               |
| Cu2-S         | 2.328(3)                  | S-Cu2-S    | 109.4(2)               |
| Cu3-S         | 2.317(4)                  | S-Cu3-S    | 109.4(2)               |
| Cu4-S         | 2.316(4)                  | S-Cu4-S    | 109.3(2)               |
| All Cu-S      | 2.322(7)                  | S-Ge1-S    | 109.4(1)               |
| Ge1-S         | 2.235(3)                  | S-Ge2-S    | 109.5(2)               |
| Ge2-S         | 2.236(3)                  | S-Mn-S     | 109.5(2)               |
| All Ge-S      | 2.236(4)                  | All S-Cu-S | 109.4(3)               |
| Ge-S (short)* | 2.213(4)                  | All S-Ge-S | 109.4(2)               |
| Mn-S          | 2.430(4)                  | S-Cu1-S    | 109.4(2)               |
| S1-M          | 2.351(3)                  |            |                        |
| S2-M          | 2.326(4)                  |            |                        |
| S3-M          | 2.328(4)                  |            |                        |
| S4-M          | 2.313(3)                  |            |                        |
| S5-M          | 2.326(3)                  |            |                        |
| S6-M          | 2.277(3)                  |            |                        |
| S7-M          | 2.269(3)                  |            |                        |
| All S-M       | 2.313(9)                  |            |                        |

\*The short Ge-S bond average excludes the Ge1-S1 and Ge2-S1 bonds.

Table S7. Extended connectivity table for  $\text{Cu}_4\text{MnGe}_2\text{S}_7$  used to predict structural distortions according to Pauling's second rule. When the charge on the sulfur is compensated (CMP) by the cations in its first coordination sphere the coordination polyhedron is regular. When the charge of the sulfur is over CMP or under CMP cation-anion bonds will lengthen and shorten, respectively.

|                             |                             | Anions        |               |               |               |                               |                               | Horizontal Bond Strength Sums |              |
|-----------------------------|-----------------------------|---------------|---------------|---------------|---------------|-------------------------------|-------------------------------|-------------------------------|--------------|
|                             |                             | S1            | S2            | S3            | S4            | S5                            | S6                            | S7                            |              |
| Cations                     | Cu1                         | $\frac{1}{4}$ |               |               |               | $\frac{1}{4}$                 | $\frac{1}{4}$                 | $\frac{1}{4}$                 | $\Sigma = 1$ |
|                             | Cu2                         | $\frac{1}{4}$ | $\frac{1}{4}$ |               |               |                               | $\frac{1}{4}$                 | $\frac{1}{4}$                 | $\Sigma = 1$ |
|                             | Cu3                         |               | $\frac{1}{4}$ | $\frac{1}{4}$ | $\frac{1}{4}$ |                               |                               | $\frac{1}{4}$                 | $\Sigma = 1$ |
|                             | Cu4                         |               |               | $\frac{1}{4}$ | $\frac{1}{4}$ | $\frac{1}{4}$                 | $\frac{1}{4}$                 |                               | $\Sigma = 1$ |
|                             | Mn                          |               | $\frac{2}{4}$ | $\frac{2}{4}$ | $\frac{2}{4}$ | $\frac{2}{4}$                 |                               |                               | $\Sigma = 2$ |
|                             | Ge1                         | $\frac{4}{4}$ |               |               | $\frac{4}{4}$ | $\frac{4}{4}$                 | $\frac{4}{4}$                 |                               | $\Sigma = 4$ |
|                             | Ge2                         | $\frac{4}{4}$ | $\frac{4}{4}$ | $\frac{4}{4}$ |               |                               |                               | $\frac{4}{4}$                 | $\Sigma = 4$ |
| Vertical Bond Strength Sums | $\Sigma = 2.5$<br>$2.5 > 2$ | $\Sigma = 2$  | $\Sigma = 2$  | $\Sigma = 2$  | $\Sigma = 2$  | $\Sigma = 1.75$<br>$1.75 < 2$ | $\Sigma = 1.75$<br>$1.75 < 2$ |                               |              |
| Charge compensation         | OVER<br>CMP                 | CMP           | CMP           | CMP           | CMP           | UNDER<br>CMP                  | UNDER<br>CMP                  |                               |              |

Table S8. Bond valence sums, provided for each crystallographically unique ion, and global instability index (G) values for  $\text{Cu}_2\text{MnGeS}_4$  and  $\text{Cu}_4\text{MnGe}_2\text{S}_7$ .

| Compound                             | Space Group | Bond Valence Sums                                    |                   |                                |                                                                                   | G values | Structure Reference                                                                        |
|--------------------------------------|-------------|------------------------------------------------------|-------------------|--------------------------------|-----------------------------------------------------------------------------------|----------|--------------------------------------------------------------------------------------------|
|                                      |             | $\text{Cu}^+$                                        | $\text{Mn}^{2+*}$ | $\text{Ge}^{4+}$               | $\text{S}^{2-}$                                                                   |          |                                                                                            |
| $\text{Cu}_2\text{MnGeS}_4$          | $Pmn2_1$    | (4b)<br>1.26                                         | (2a)<br>2.04      | (2a)<br>3.89                   | S1(2a) 2.04<br>S2(2a) 2.07<br>S3(4b) 2.22                                         | 0.18     | T. Bernert,<br>A. Pfitzner,<br><i>Z. Kristallogr.</i> ,<br>2005, <b>220</b> , 968-<br>972. |
| $\text{Cu}_4\text{MnGe}_2\text{S}_7$ | $Cc$        | (4a)<br>Cu1 1.27<br>Cu2 1.26<br>Cu3 1.29<br>Cu4 1.30 | (4a)<br>2.15      | (4a)<br>Ge1: 3.82<br>Ge2: 3.82 | (4a)<br>S1 2.10<br>S2 2.16<br>S3 2.14<br>S4 2.20<br>S5 2.15<br>S6 2.05<br>S7 2.10 | 0.19     | This work                                                                                  |

$R_0$  and  $b$  values come from [https://www.iucr.org/\\_data/assets/file/0011/150779/bvparm2020.cif](https://www.iucr.org/_data/assets/file/0011/150779/bvparm2020.cif)

\*The  $R_0$  values were used for the specific oxidation states of the ions except for  $\text{Mn}^{2+}$ , which has an “unchecked”/unreliable  $R_0$  value. In the case of Mn, we used the value for the unspecified oxidation state,  $R_0=2.20 \text{ \AA}$ , which can also be found in the following reference: N. E. Brese, M. O’Keeffe, *Acta Cryst.* 1991, **B47**, 192-197.



Table S9. The electronic bandgaps at different  $k$ -points using the PBE and HSE06 functional in  $\text{Cu}_2\text{MnGeS}_4$ .

| K-point         | $E_g^{\text{PBE}}$ (eV) | $E_g^{\text{HSE06}}$ (eV) | $\Delta E_g$ (eV) |
|-----------------|-------------------------|---------------------------|-------------------|
| (0, 0, 0)       | 0.6                     | 1.9                       | 1.3               |
| (1/2, 0, 0)     | 1.3                     | 3                         | 1.7               |
| (1/2, 1/2, 0)   | 1.8                     | 3.4                       | 1.6               |
| (0, 1/2, 0)     | 0.8                     | 2.2                       | 1.4               |
| (0, 0, 1/2)     | 0.8                     | 2.3                       | 1.5               |
| (1/2, 0, 1/2)   | 1.4                     | 3.1                       | 1.7               |
| (1/2, 1/2, 1/2) | 1.7                     | 3.2                       | 1.5               |

Table S10: The electronic bandgaps at different  $k$ -points using the PBE and HSE06 functional in  $\text{Cu}_4\text{MnGe}_2\text{S}_7$ .

| K-point         | $E_g^{\text{PBE}}$ (eV) | $E_g^{\text{HSE06}}$ (eV) | $\Delta E_g$ (eV) |
|-----------------|-------------------------|---------------------------|-------------------|
| (0, 0, 0)       | 0.5                     | 1.7                       | 1.2               |
| (1/2, 0, 0)     | 0.8                     | 2.1                       | 1.3               |
| (0, 1/2, 0)     | 0.9                     | 2.3                       | 1.4               |
| (1/2, 1/2, 0)   | 0.9                     | 2.3                       | 1.4               |
| (1/2, 1/2, 1/3) | 1                       | 2.2                       | 1.2               |
| (0, 1/2, 1/3)   | 1.1                     | 2.4                       | 1.3               |
| (1/2, 1/2, 1/3) | 1                       | 2.3                       | 1.3               |

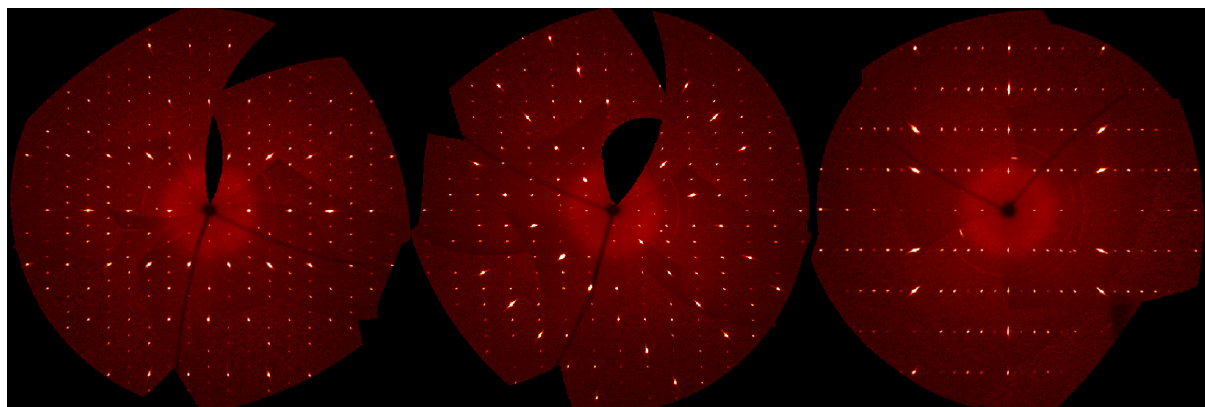

Figure S1. Simulated precession images for  $\text{Cu}_4\text{MnGe}_2\text{S}_7$  created using the single-crystal X-ray diffraction data. The (0kl), (h0l), and (hk0) planes in reciprocal space are shown from left to right, respectively. Sharp, bright spots are observed indicative of a single crystal.

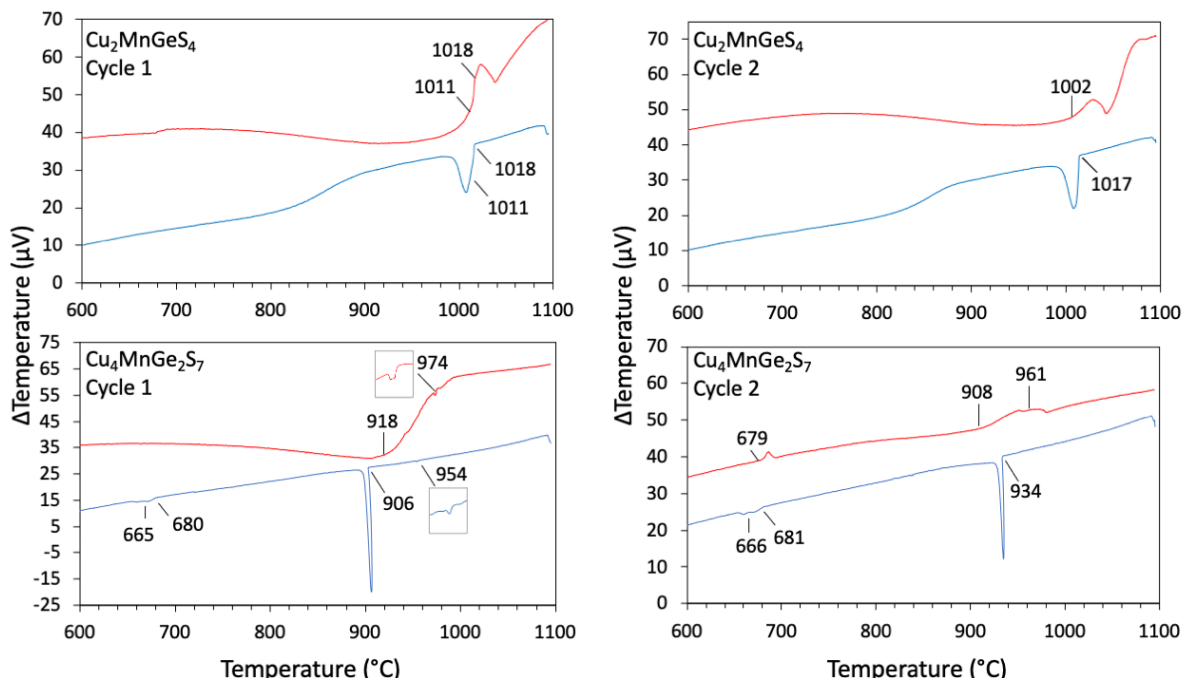

Figure S2. Differential thermal analysis diagrams for  $\text{Cu}_2\text{MnGeS}_4$  (top) and  $\text{Cu}_4\text{MnGe}_2\text{S}_7$  (bottom). Two cycles were conducted for each experiment.

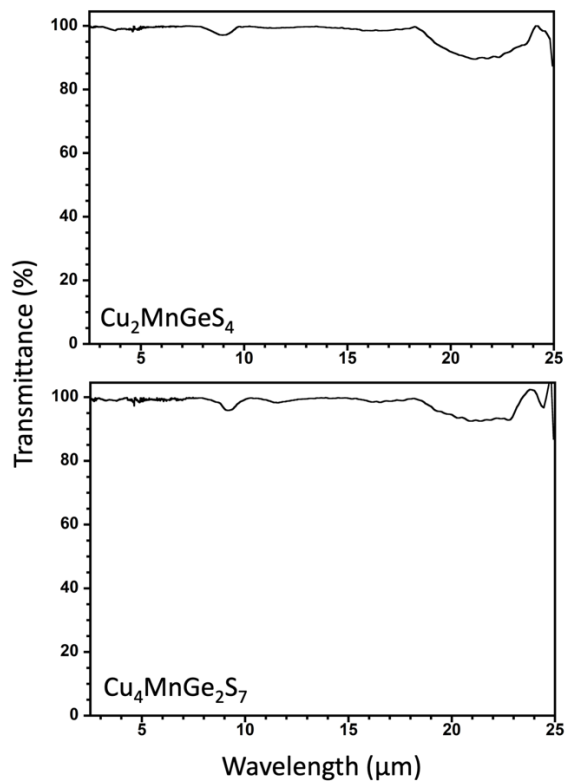

Figure S3. Attenuated total reflectance FT-IR data converted to transmittance for  $\text{Cu}_2\text{MnGeS}_4$  and  $\text{Cu}_4\text{MnGe}_2\text{S}_7$ .
